# Supplementary material for: In Vitro and In Vivo Effects of IGF-1 Delivery Strategies on Tendon Healing: A Review
Source: MDPI journal article supplement (doi:10.3390/ijms24032370), 2023-01-25
Supplement: s1 [file s1]

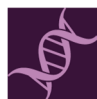

## *Supporting Information*

### *Review*

# ***In vitro* and *in vivo* effects of IGF-1 delivery strategies on tendon healing: a review**

**Iris Miescher <sup>1,†</sup>, Julia Rieber <sup>1,†</sup>, Maurizio Calcagni <sup>1</sup> and Johanna Buschmann <sup>1,\*</sup>**

Division of Plastic Surgery and Hand Surgery, University Hospital Zurich, Sternwartstrasse 14, 8091 Zurich, Switzerland

\* Correspondence: johanna.buschmann@usz.ch; Tel.: +41-44-255-98-95

† Equal contribution

**Tables S1 – S5**

**Table S1.** Summary of *in vitro* tested conditions and cellular response of stem cells upon IGF-1 administration (sorted alphabetically according to cell species). Key: ↑ = increased, ↓ = decreased, → = no change, AA = Ascorbic acid, ASC = adipose-derived stem cells, BSA = bovine serum albumin, col = collagen, COMP = cartilage oligomeric matrix protein, DCN = Decorin, DMEM = Dubelco's Modified Eagle Medium, EGR1 = early growth response protein 1, FCS = fetal calf serum, Ham's F12 = Tenocyte culture medium, LLLT = low-level laser therapy, MSC = bone marrow-derived stem cells, ON = Osteonectin, SCX = scleraxis, TNC = tenascin-C, TNMD = Tenomodulin, TSC = tendon-derived stem cells.

| <i>In vitro</i> model            | IGF-1 [ng/mL] | Administration                                                        | Time point | Cellular response                                                                                                                                                                                                 | Gene expression                             |
|----------------------------------|---------------|-----------------------------------------------------------------------|------------|-------------------------------------------------------------------------------------------------------------------------------------------------------------------------------------------------------------------|---------------------------------------------|
| Canine MSCs [1]                  | 10            | 3D high-density cultures on a nitrocellulose filter on a steel grid   | 7 d, 14 d  | Similar morphology, intercellular contacts and extracellular organization like tenocytes<br><i>Protein synthesis:</i><br>col I <i>no</i><br>col III <i>no</i><br>DCN <i>no</i><br>TNMD <i>no</i><br>SCX <i>no</i> |                                             |
| Equine bone marrow MSCs [2]      | 100           | On tendon matrix, high-glucose DMEM with 10 % FBS                     | 7 d        | Proliferation ↑<br>Matrix proteins, col synthesis →<br>GAG synthesis ↑                                                                                                                                            | COL1 →<br>COL3 →<br>COMP →                  |
| Equine bone marrow MSCs [3]      | 10            | High-glucose DMEM with 10 % FCS and 37.5 µg/mL AA on a col I hydrogel | 10 d       | Matrix proteins:<br>GAG →<br>Gel contraction →                                                                                                                                                                    | COL1 →<br>COL3 →<br>DCN →<br>BGN →<br>SCX → |
| Equine peripheral blood MSCs [4] | 10            | DMEM with 20 % FCS, + / - LLLT                                        | 5 d        |                                                                                                                                                                                                                   | DCN →<br>TNC →<br>EGR1 →                    |
| Human ASCs [5]                   | 10, 50, 100   | Ham's F12 media with 0.2 % BSA                                        | 3 d        | Proliferation ↑<br>(best with 50 ng/mL)                                                                                                                                                                           |                                             |
| Rat TSCs [6]                     | 1, 10, 100    | Basal tendon cell medium                                              | 14 d, 28 d | Proliferation → (any dose)<br>Maintenance of stem cell phenotype<br>↑ (d 28; 10 & 100 ng/mL)<br><i>Protein expression (same treatment over time):</i><br>col I ↓ (d 14);                                          |                                             |

|              |             |                                                                                                  |     |                                                                                                                                                                                                                                                                                                                                                                       |
|--------------|-------------|--------------------------------------------------------------------------------------------------|-----|-----------------------------------------------------------------------------------------------------------------------------------------------------------------------------------------------------------------------------------------------------------------------------------------------------------------------------------------------------------------------|
|              |             |                                                                                                  |     | ↑ (d 28, 10 & 100)<br>col II ↓ (d 28),<br>→ (10 & 100)<br>SCX ↑ (d 28)<br>DCN ↑ (d 28, 1); →<br>TNC ↓ (d 28, 10); →<br>ON ↑ (d 14,);<br>↓ (d 14, 100); →<br><i>(same time point compared to control):</i><br>col I ↓ (d 14);<br>→ (d 28)<br>col II ↓ (d 14),<br>↑ (d 28, 10 & 100)<br>SCX ↑<br>DCN ↓ (d 14); ↑ (d 28)<br>TNC ↓ (d 28, 10); →<br>ON ↓ (d 14); ↑ (d 28) |
| Rat ASCs [7] | 10, 50, 100 | Reseeding in a tendon-specific hydrogel from human cadaver tendons in ECM solution with 10 % FCS | 5 d | Proliferation ↑<br>(best with 100 ng/mL)                                                                                                                                                                                                                                                                                                                              |

**Table S2.** Summary of *in vitro* tested conditions and cellular response of tenocytes and tendon fibroblasts upon IGF-1 administration (sorted alphabetically according to cell species). Key: ↑ = increased, ↓ = decreased, → = no change, α-MEM = α-MEM α-MEM Medium, AA = ascorbic acid, AbAm = antibiotic antimycotic, ACAN = aggrecan, ALP = alkaline phosphatase, BAPN = beta-aminopropionitrile, BSA = bovine serum albumin, col = collagen, COMP = cartilage oligomeric matrix protein, DCN = Decorin, dd = dose-dependent, DMEM = Dubelco's Modified Eagle Medium, GAG = glycosaminoglycan, FBS = fetal bovine serum, M-199 = name of medium Mki67 = marker of proliferation Ki-67, mRNA = messenger ribonucleic acid, SCX = scleraxis, SOX9 = SRY-box transcription factor 9, TNC = tenascin-C, TNMD = Tenomodulin, RUNX = runt-related transcription factor.

| <i>In vitro</i> model                                                   | IGF-1 [ng/mL]      | Administration                                                      | Time point                                               | Cellular response                                                                                                                                                                  | Gene expression                                                                   |
|-------------------------------------------------------------------------|--------------------|---------------------------------------------------------------------|----------------------------------------------------------|------------------------------------------------------------------------------------------------------------------------------------------------------------------------------------|-----------------------------------------------------------------------------------|
| Avian tendon epitenon surface cells and tendon internal fibroblasts [8] | 0.076, 0.38, 0.76  | DMEM without FCS, mechanical load (1 Hz, 0.05 max. strain for 8 h)  | 1 d                                                      | Proliferation ↑ (higher with load than without; dd)                                                                                                                                |                                                                                   |
| Equine tendon cells [2]                                                 | 100                | On tendon matrix, high-glucose DMEM with 10 % FBS and 37.5 µg/mL AA | 7 d                                                      | Proliferation ↑<br>Matrix proteins :<br>col synthesis ↑<br>GAG synthesis ↑                                                                                                         | COL1→<br>COL3→<br>COMP→                                                           |
| Equine tenocytes [9]                                                    | 10, 50, 200        | Anisotropic GAG scaffolds, serum-free, non-supplemented DMEM        | 1 d (Chemotaxis)<br>7 d (Proliferation, gene expression) | Proliferation ↑ (dd)<br>Metabolic activity ↑ (dd)<br>Migration ↑ (dd)<br>Soluble col ↑                                                                                             | COL1↑<br>COL3↑<br>SCX ↓<br>DCN ↑ (low dose) / ↓<br>TNC ↑ (low dose) / ↓<br>COMP ↓ |
| Equine explant culture from superficial digital flexor tendons [10]     | 250, +/- 3 mg BAPN | Explant culture in M-199 media containing 100 µg/mL AA and 5 % FBS  | 10 d                                                     | Proliferation ↑<br>Matrix proteins :<br>col synthesis → ; GAG content →<br>In situ hybridization:<br>col I & col III mRNA →                                                        |                                                                                   |
| Human tenocytes [11]                                                    | 10, 50             | α-MEM with 0 % FBS (control: 10 % FBS)                              | 14 d                                                     | Survival of tenocytes without FBS for 14 days but no proliferation col layers less aggregated and weaker than control cells<br>Very low col synthesis<br>Spindle-shaped morphology | (50 ng/mL)<br>SCX →<br>COL1↑<br>TNMD →<br>DCN ↑                                   |

|                                                                             |                       |                                                                       |                             |                                                                        |                                                                                                                                     |
|-----------------------------------------------------------------------------|-----------------------|-----------------------------------------------------------------------|-----------------------------|------------------------------------------------------------------------|-------------------------------------------------------------------------------------------------------------------------------------|
| Human fibroblasts, and tenocytes [5]                                        | 10, 50, 100           | Ham's F12 media with 0.2 % BSA                                        | 3 d                         | Proliferation ↑ (both cell types, best with 50 ng/mL)                  |                                                                                                                                     |
|                                                                             |                       |                                                                       |                             |                                                                        | (0. 5% FCS, d 10, 14)<br>COL1↑<br>COL3↑<br>SCX ↑<br>TNMD ↑                                                                          |
| Human tenocytes [12]                                                        | 2.5 × 10 <sup>8</sup> | DMEM / F12 with 0.5 or 10 % FBS in-coated plates with ~1.5 ml SYLGARD | 7 d, 14 d, 10 d, 21 d, 28 d | Fibril diameter ↑ (d 21, not d 28)<br>Mean col content ↑               | (10 % FCS, d 21, 28)<br>COL1↓<br>COL3↓<br>SCX ↓<br>TNMD ↓                                                                           |
|                                                                             |                       |                                                                       |                             |                                                                        | (1h, 2h, 6h, 24 h)<br>COL1A1→<br>COL1A2→<br>COL3↑ (6 & 24 h )<br>ki 67 ↑ (6 & 24 h)<br>SCX ↑ (1 & 2 h)<br>TNMD →<br>BGN ↓<br>COMP ↓ |
| Mouse tenocytes [13]                                                        | 100                   | Low-glucose DMEM with 1 % AbAm                                        | 1, 2, 6, 24 h               | Proliferation ↑ (highest after 24 h)                                   |                                                                                                                                     |
|                                                                             |                       |                                                                       |                             |                                                                        |                                                                                                                                     |
| Rabbit tendon cells (synovial sheath (S), epitenon (E), endotenon (T)) [14] | 10, 50, 100           | Serum-free Ham's F12 with 0.2 % BSA                                   | 3 d                         | Proliferation ↑ (dd only synovial sheath cells)                        |                                                                                                                                     |
|                                                                             |                       |                                                                       |                             |                                                                        | COL1→<br>COL3→<br>DCN →<br>TNMD ↑<br>SCX →<br>RUNX →<br>ALP ↑<br>ACAN ↑<br>SOX9 ↓                                                   |
| Rat tenocytes [15]                                                          | 10, 50, 100           | DMEM / F12 with 0.5 % FBS                                             | 3 d                         | Proliferation → (at any dose)<br>col deposition ↑ (only with 10 ng/mL) |                                                                                                                                     |

**Table S3.** Summary of *in vitro* tested conditions and cellular responses on stem cells upon administration of IGF-1 in combination with other growth factors (sorted alphabetically according to cell species). Key: ↑ = increased, → = no change, ↓ = decreased, AA = ascorbic acid, ASC = adipose-derived stem cells, bFGF = basic fibroblast growth factor, BMP-12 = bone morphogenic protein-12 (= GDF-7), col = collagen, CTGF = connective tissue growth factor, BGN = Biglycan, BSA = bovine serum albumin, DCN = Decorin, ECM = extra cellular matrix, GAG = glycosaminoglycan, EGR1 = early growth response protein 1, FCS = fetal calf serum, LLLT = low-level laser technology, MSC = bone marrow-derived stem cells, PDGF-BB = platelet-derived growth factor, SCX = scleraxis, TGFβ = transforming growth factor beta, TNC = Tenascin-C, TNMD = Tenomodulin.

| <i>In vitro</i> model            | Growth factor [ng/mL]                            | Administration                                                         | Time point | Cellular response                                                                                                                                                                                           | Gene expression                                                                                                                                  |
|----------------------------------|--------------------------------------------------|------------------------------------------------------------------------|------------|-------------------------------------------------------------------------------------------------------------------------------------------------------------------------------------------------------------|--------------------------------------------------------------------------------------------------------------------------------------------------|
| Canine MSCs [1]                  | IGF-1: 5<br>TGFβ1: 5                             | 3D high-density cultures on a nitrocellulose filter on a steel grid    | 7 d, 14 d  | Similar morphology, as tenocytes (spindle-shaped morphology, intercellular contacts, extracellular organization)<br><i>Protein synthesis:</i><br>col I yes<br>col III yes<br>DCN yes<br>TNMD yes<br>SCX yes |                                                                                                                                                  |
| Equine peripheral blood MSCs [4] | IGF-1: 10<br>bFGF: 10                            | DMEM with 20 % FCS, + / - LLLT                                         | 5 d        | Proliferation →                                                                                                                                                                                             | DCN →<br>TNC →<br>EGR1 →                                                                                                                         |
| Equine bone marrow MSCs [3]      | IGF-1 & BMP-12: 10 & 50<br>IGF-1 & TGFβ1: 10 & 5 | High-glucose DMEM with 10 % FCS and 37.5 µg/mL AA on a col I hydro-gel | 10 d       | <i>Matrix protein:</i><br>GAG content ↑ (both conditions)<br>Gel contraction ↑ (IGF-1 & TGFβ1)                                                                                                              | a) <b>both conditions</b><br>BGN →<br>SCX →<br>COL1 →<br>COL3 →<br>b) <b>IGF-1 &amp; BMP-12</b><br>DCN ↑<br>c) <b>IGF-1 &amp; TGFβ1</b><br>DCN → |
| Human ASCs [5]                   | IGF-1: 50, 100<br>bFGF: 5, 10<br>PDGF-BB: 10, 50 | Ham's F12 media with 0.2 % BSA                                         | 3 d        | Proliferation ↑<br>(best with 50 ng/mL IGF-1, 5 ng/mL bFGF, and 50 ng/mL PDGF-BB)                                                                                                                           |                                                                                                                                                  |
| Human ASCs [5]                   | IGF-1: 50<br>bFGF: 5<br>PDGF-BB: 50              | Repopulation on tendon scaffold in Ham's F12                           | 3 d        | Proliferation ↑ col production of reseeded cells continues on tendon scaffold after incubation of 12 days                                                                                                   |                                                                                                                                                  |

|                          |                                                                |                                                                                                                       |           |                                                                                           |                                                             |
|--------------------------|----------------------------------------------------------------|-----------------------------------------------------------------------------------------------------------------------|-----------|-------------------------------------------------------------------------------------------|-------------------------------------------------------------|
| Human ASCs and MSCs [16] | IGF-1: 50<br>with BMP-12,<br>CTGF, TGF $\beta$ 3,<br>AA, b-FGF | High-glucose<br>DMEM with 1 %<br>FCS                                                                                  | 3 d, 10 d |                                                                                           | In IGF-1-free medium<br>(both cell types)<br>SCX →<br>DCN → |
| Rat ASCs [7]             | IGF-1: 50, 100<br>bFGF: 5 10<br>PDGF-BB: 50, 100               | Reseeding in a ten-<br>don-specific hydro-<br>gel from human ca-<br>daver tendons in<br>ECM solution with<br>10 % FCS | 5 d       | Proliferation ↑<br>(best with<br>100 ng/mL IGF-1,<br>10 ng/mL bFGF,<br>100 ng/mL PDGF-BB) |                                                             |

**Table S4.** Summary of *in vitro* tested conditions and cellular responses on tenocytes and fibroblasts upon administration of IGF-1 in combination with other growth factors (sorted alphabetically according to cell species). Key: ↑ = increased, ↓ = decreased, → = no change, AA = ascorbic acid, bFGF = basic fibroblast growth factor, BMP-12 = bone morphogenic protein (= GDF-7), BSA = bovine serum albumin, col = collagen, COMP = cartilage oligomeric matrix protein, CTGF = connective tissue growth factor, DCN = Decorin, dd = dose-dependent, GAG = glycosaminoglycan, GDF-5 = growth differentiation factor, FBS = fetal bovine serum, FCS = fetal calf serum, PDGF-BB = platelet-derived growth factor, SCX = Scleraxis, TGFβ = transforming growth factor beta, TNC = tenascin-C, TNMD = Tenomodulin.

| <i>In vitro</i> model                                                   | Growth factor [ng/mL]                                 | Administration                                                     | Time point                                               | Cellular response                                                                                                                                                                                                                                                                       | Gene expression                                                                            |
|-------------------------------------------------------------------------|-------------------------------------------------------|--------------------------------------------------------------------|----------------------------------------------------------|-----------------------------------------------------------------------------------------------------------------------------------------------------------------------------------------------------------------------------------------------------------------------------------------|--------------------------------------------------------------------------------------------|
| Avian tendon epitenon surface cells and tendon internal fibroblasts [8] | IGF-1: 0.76<br>PDGF-BB: 0.24, 1.2, 2.4                | DMEM without FCS, mechanical load (1 Hz, 0.05 max. strain for 8 h) | 1 d                                                      | Proliferation ↑ (higher with load than without, PDGF-BB; dd)                                                                                                                                                                                                                            |                                                                                            |
| Equine tenocytes [9]                                                    | IGF-1 pairings:<br>IGF-1: 50<br>bFGF: 5<br>GDF-5: 500 | Anisotropic GAG scaffolds, serum-free, non-supplemented DMEM       | 1 d (Chemotaxis)<br>7 d (Proliferation, gene expression) | Proliferation ↑ (not as high as combinations of bFGF and GDF-5 with PDGF-BB)                                                                                                                                                                                                            | a) <b>IGF-1 &amp; bFGF</b><br>COL1 →<br>COL3 →<br>SCX ↓<br>DCN →<br>TNC →<br>COMP ↓        |
|                                                                         |                                                       |                                                                    |                                                          | Metabolic activity ↑ (not as high as combinations of bFGF and GDF-5 with PDGF-BB)                                                                                                                                                                                                       | b) <b>IGF-1 &amp; GDF-5</b><br>COL1 →<br>COL3 →<br>SCX ↑<br>DCN →<br>TNC →<br>COMP ↑       |
|                                                                         |                                                       |                                                                    |                                                          | Soluble col ↑<br>(higher with GDF-5 than with bFGF)                                                                                                                                                                                                                                     |                                                                                            |
| Human tenocytes [11]                                                    | IGF-1: 10, 50<br>TGFβ3: 1, 10                         | α-MEM with 0 % FBS<br>(control: 10 % FBS)                          | 14 d                                                     | Survival of tenocytes without FBS for 14 d (no proliferation)<br>Spindle-shaped morphology<br>Cell alignment and col fibril morphology similar to control cells<br>col synthesis increased with combination of IGF-1 (50 ng/mL) and TGFβ3 (10 ng/mL) but still lower than control cells | Combination of IGF-1 (50 ng/mL) and TGFβ3 (10 ng/mL)<br>SCX ↑<br>COL1 ↑<br>TNMD ↑<br>DCN ↑ |



|                                                                             |                                                                           |                                              |           |                                                                                                                               |
|-----------------------------------------------------------------------------|---------------------------------------------------------------------------|----------------------------------------------|-----------|-------------------------------------------------------------------------------------------------------------------------------|
| Human fibroblasts and tenocytes [5]                                         | IGF-1: 50, 100<br>bFGF: 5, 10<br>PDGF-BB: 10, 50                          | Ham's F12 media with 0.2 % BSA               | 3 d       | Both cell types:<br>Proliferation ↑<br>(best with 50 ng/mL IGF-1, 5 ng/mL bFGF, 50 ng/mL PDGF-BB)                             |
| Human fibroblasts and tenocytes [5]                                         | IGF-1: 50<br>bFGF: 5<br>PDGF-BB: 50                                       | Repopulation on tendon scaffold in Ham's F12 | 3 d       | Both cell types:<br>Proliferation ↑<br>col production of reseeded cells continues on tendon scaffold after incubation of 12 d |
| Human tendon cells [16]                                                     | IGF-1: 50<br>in different combinations with BMP-12, CTGF, TGFβ3, AA, bFGF | High-glucose DMEM with 1 % FCS               | 3 d, 10 d | In IGF-1-free medium:<br>SCX →<br>DCN →                                                                                       |
| Rabbit tendon cells (synovial sheath (S), epitenon (E), endotenon (T)) [14] | IGF-1: 10, 50, 100<br>PDGF-BB: 1, 10, 50<br>bFGF: 1, 5                    | Serum-free Ham's F12 with 0.2 % BSA          | 3 d       | Proliferation ↑ (best with 100 ng/mL IGF-1, 5 ng/mL bFGF, 50 ng/mL PDGF-BB)                                                   |

**Table S5.** Overview of *in vivo* experiments and outcomes after IGF-1 or GH administration, key: ↑ = increased, ↓ = decreased, → = no change, - = not assessed, col = collagen, DNA = desoxy ribonucleic acid, FSR = fractional synthesis rates, GH = growth hormone, H&E Hematoxylin&Eosin, HSR = heavy slow resistance, m = mimic, mRNA = messenger ribonucleic acid, PINP = procollagen type I N-terminal propeptide, PRF = platelet rich fibrin, PRP = platelet rich plasma, HSR = heavy slow resistance, rhGH = recombinant human growth factors VISA-P = Victorian Institute of Sport Assessment–Patella, GH = growth hormone, FSR = fractional synthesis rates, PINP = procollagen type I N-terminal propeptide, H&E Hematoxylin&Eosin . Outcomes noted in brackets are not statistically significant.

| <i>In vivo</i> model                       | Growth factor concentration               | Administration                          | Time point | Biomechanics                                                                                                                                                                                                                                                                                                                                                                       | Histology                                                           | Other outcomes                                                                |
|--------------------------------------------|-------------------------------------------|-----------------------------------------|------------|------------------------------------------------------------------------------------------------------------------------------------------------------------------------------------------------------------------------------------------------------------------------------------------------------------------------------------------------------------------------------------|---------------------------------------------------------------------|-------------------------------------------------------------------------------|
| Rat Achilles tendon full transection [17]  | 25 µg LR3-IGF-1; 1 mg Carrageenan         | Inert 4 % methyl-cellulose gel          | 15 d       | IGF-1:<br>Time until functional recovery ↓<br>(Failure with surgery ↑)<br>Tendon length and circumference →<br>Failure loads →<br>Failure deformation →<br>Transection:<br>Gross stiffness ↓                                                                                                                                                                                       | Transection:<br>Altered tendon structure<br>Inflammatory reaction ↑ | IGF-1:<br>Achilles index ↑<br>Functional deficit ↓<br>Neutrophilic invasion → |
|                                            |                                           |                                         |            | Loaded + GH + transection:<br>Peak force, peak stress, elastic modulus, cross sectional area →<br>Stiffness ↓<br>Loaded + GH + sham:<br>Peak force, peak stress, elastic modulus, cross sectional area, stiffness →<br>Unloaded + transection:<br>Peak force, peak stress, stiffness elastic modulus ↓<br>Unloaded + sham:<br>Peak force, peak stress, stiffness elastic modulus → | -                                                                   | Loaded + GH:<br>Anabolic effect<br><br>Unloaded + GH:<br>Anabolic effect      |
| Rat Achilles ten-don full transection [18] | 2 mg/kg bodyweight GH<br>1 U Botox/Muscle | Daily injection divided in 2 injections | 10 d       |                                                                                                                                                                                                                                                                                                                                                                                    |                                                                     |                                                                               |

|                                    |                              |                                                                           |                    |                                                                                              |                                                                                                                                                                                                              |                                                                                                                         |
|------------------------------------|------------------------------|---------------------------------------------------------------------------|--------------------|----------------------------------------------------------------------------------------------|--------------------------------------------------------------------------------------------------------------------------------------------------------------------------------------------------------------|-------------------------------------------------------------------------------------------------------------------------|
| Rat rotator cuff tear [19]         | rh-IGF-1, PEG-IGF-1m, IGF-1m | Matrix with incorporated IGF-1, sutured onto defect                       | 4, 8 w             | PEG-IGF-1m: Failure load, stiffness, work to failure, strength, Young's Modulus, toughness ↑ | Intervention: Tissue healing →<br>Cellularity ↑<br>remodeling ↑<br>PEG-IGF-1m: Col organized ↑<br>Round cell morphology ↑<br>Cellularity ↓<br>Col maturation ↑<br>PEG-IGF-1m, IGF-1m: Cellular orientation ↑ | PEG-IGF-1m: Tendon typical appearance ↑<br>Cross sectional area ↓                                                       |
| Horse Flexor tendinitis [20]       | 2 µg rhIGF-1                 | 1 injection divided into 4 small injections every second day for 10 times | 0, 2, 3, 4, 6, 8 w | Load, load normalized by body weight, stress →<br>IGF-1: (Stiffness ↑)                       | Cellularity ↑<br>IGF-1: Individual H&E scores for cell morphology, col fiber linearity, crimping, uniformity, density, inflammatory cells, neovascularisation, epitenon thickening → (Total H&E score ↑)     | IGF-1: DNA and hydroxyproline ↑<br>GAGs →<br>col I and col III →<br>Limb circumference →<br>Swelling ↓<br>Lesion size ↓ |
| Rabbit Achilles tendon defect [21] | 0.5 cm <sup>3</sup> PRF      | Applied into defect                                                       | 6 w                | -                                                                                            | PRF: Repair zone filled with heterogeneous tissue, elongated cells<br>High cellularity<br>Dense collagen                                                                                                     | PRF: Aligned tendon fibers<br>Continuous fibrillary appearance                                                          |

|                                    |                                 |                                   |                 |                                                                                                                                                  |                                                                                                                                                                 |                                                                                                                                                                                                  |
|------------------------------------|---------------------------------|-----------------------------------|-----------------|--------------------------------------------------------------------------------------------------------------------------------------------------|-----------------------------------------------------------------------------------------------------------------------------------------------------------------|--------------------------------------------------------------------------------------------------------------------------------------------------------------------------------------------------|
| Rabbit Patellar Tendon Defect [22] | 25 µg rhIGF-1<br>4 ng<br>TGF-β1 | Fibrin sealant gel into the wound | 2, 6 w          | IGF-1:<br>Force at failure, ultimate stress, energy uptake, stiffness ↑ w 2<br>Force at failure, ultimate stress, energy uptake, stiffness → w 6 | IGF-1:<br>Vessel number ↑<br>Plump shaped tenocytes ↑ w 2, → w 6<br>(Orientation of repair tissue ↑)                                                            | -                                                                                                                                                                                                |
| Rabbit Patellar Tendon Defect [23] | PRP enough to fill defect       | Applied into defect               | 1, 2, 3 and 4 w | -                                                                                                                                                | PRP:<br>Appearance of repair site → w 1-2<br>Denser tissue<br>Less elastic fibers ↓<br>Tenocyte orientation ↑<br>Immature tissue ↓ w 3<br>Completely healed w 4 | PRP:<br>IGF-1 in epitenon & endotenon ↑ w 1-3<br>IGF-1 in endotenon ↓ w 4<br>IGF-1 in epitenon ↑ w 1-4<br>Control:<br>IGF-1 in epitenon ↑ w 1-3<br>IGF-1 in endotenon compared to epitenon ↑ w 4 |
| Human patellar tendon [24]         | 1 mg rhIGF-1                    | Injection on day 1 and 2          | d 2             | -                                                                                                                                                | -                                                                                                                                                               | IGF-1:<br>Interstitial tissue [IGF-1] locally ↑<br>Higher interstitial [IGF-1] than circulating [IGF-1]<br>Collagen FSR ↑<br>1.5 – 4.5 h<br>PINP expression ↑ 2-3 h                              |
| Human patellar tendon [25]         | 0.1 mL of rhIGF-1 (10 mg/mL)    | Injection at w 0, 12 w follow-up  |                 | -                                                                                                                                                | -                                                                                                                                                               | Tendinopathic:<br>COL1A1 & COL3A1 ↑<br>(IGF-1Ea ↑)                                                                                                                                               |

| HSR training |  |  |  |  |  | Total mRNA             |  |
|--------------|--|--|--|--|--|------------------------|--|
|              |  |  |  |  |  | IGF-1 ↑:               |  |
|              |  |  |  |  |  | Doppler activity       |  |
|              |  |  |  |  |  | ↓ w 12                 |  |
|              |  |  |  |  |  | Tendon thickness →     |  |
|              |  |  |  |  |  | Sports activity ↑      |  |
|              |  |  |  |  |  | Placebo:               |  |
|              |  |  |  |  |  | Tendon thickness ↓,    |  |
|              |  |  |  |  |  | VISA-P ↑ w 0 and 1 y   |  |
|              |  |  |  |  |  | GH:                    |  |
|              |  |  |  |  |  | Serum GH ↑             |  |
|              |  |  |  |  |  | Serum IGF-1 ↑          |  |
|              |  |  |  |  |  | Serum IGFBP-1 →        |  |
|              |  |  |  |  |  | Serum IGFBP-3 ↑        |  |
|              |  |  |  |  |  | IGF-1Ea mRNA ↑         |  |
|              |  |  |  |  |  | IGF-1Ec mRNA →         |  |
|              |  |  |  |  |  | COL1A1mRNA and         |  |
|              |  |  |  |  |  | COL3A1 mRNA ↑          |  |
|              |  |  |  |  |  | Tendon col protein FSR |  |
|              |  |  |  |  |  | ↑                      |  |

Figure S1

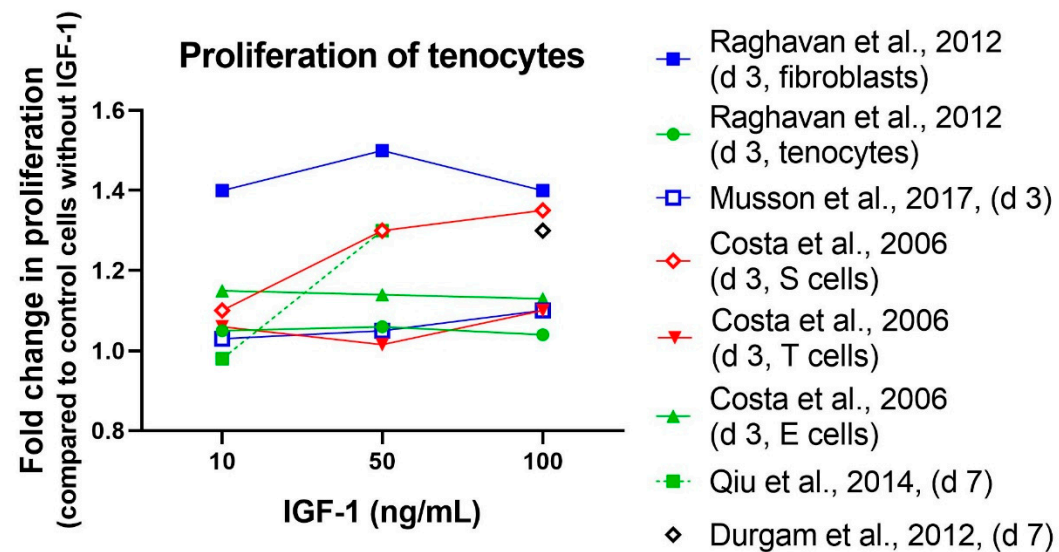

**Figure S1:** Proliferation of tenocytes as a function of IGF-1 concentration; smaller range of [IGF-1] compared to Figure 2B, in order to better distinguish the values between 10 and 100 ng/mL [2,5,11,14,15].

## References cited in the table captions

1. Schneider, P.R., Buhrmann, C., Mobasheri, A., Matis, U., and Shakibaei, M., Three-dimensional high-density co-culture with primary tenocytes induces tenogenic differentiation in mesenchymal stem cells. *J Orthop Res*, **2011**, 29(9), 1351-60.
2. Durgam, S.S., Stewart, A.A., Pondenis, H.C., Gutierrez-Nibeyro, S.M., Evans, R.B., and Stewart, M.C., Comparison of equine tendon- and bone marrow-derived cells cultured on tendon matrix with or without insulin-like growth factor-I supplementation. *Am J Vet Res*, **2012**, 73(1), 153-61.
3. Rajpar, I. and Barrett, J.G., Optimizing growth factor induction of tenogenesis in three-dimensional culture of mesenchymal stem cells. *J Tissue Eng*, **2019**, 10, 2041731419848776.
4. Gomiero, C., Bertolutti, G., Martinello, T., Van Bruaene, N., Broeckx, S.Y., Patruno, M., and Spaas, J.H., Tenogenic induction of equine mesenchymal stem cells by means of growth factors and low-level laser technology. *Vet Res Commun*, **2016**, 40(1), 39-48.
5. Raghavan, S.S., Woon, C.Y.L., Kraus, A., Megerle, K., Hung, P., and Chang, J., Optimization of Human Tendon Tissue Engineering: Synergistic Effects of Growth Factors for Use in Tendon Scaffold Repopulation. *Plastic and Reconstructive Surgery*, **2012**, 129(2), 479-489.
6. Holladay, C., Abbah, S.A., O'Dowd, C., Pandit, A., and Zeugolis, D.I., Preferential tendon stem cell response to growth factor supplementation. *J Tissue Eng Regen Med*, **2016**, 10(9), 783-98.
7. Farnebo, S., Farnebo, L., Kim, M., Woon, C., Pham, H., and Chang, J., Optimized Repopulation of Tendon Hydrogel: Synergistic Effects of Growth Factor Combinations and Adipose-Derived Stem Cells. *Hand (New York, N.Y.)*, **2017**, 12(1), 68-77.
8. Banes, A.J., Tsuzaki, M., Hu, P.Q., Brigman, B., Brown, T., Almekinders, L., Lawrence, W.T., and Fischer, T., PDGF-BB, IGF-I and mechanical load stimulate DNA synthesis in avian tendon fibroblasts in vitro. *Journal of Biomechanics*, **1995**, 28(12), 1505-1513.
9. Caliarì, S.R. and Harley, B.A.C., Composite Growth Factor Supplementation Strategies to Enhance Tenocyte Bioactivity in Aligned Collagen-GAG Scaffolds. *Tissue Engineering Part A*, **2013**, 19(9-10), 1100-1112.
10. Dahlgren, L.A., Nixon, A.J., and Brower-Toland, B.D., Effects of beta-aminopropionitrile on equine tendon metabolism in vitro and on effects of insulin-like growth factor-I on matrix production by equine tenocytes. *Am J Vet Res*, **2001**, 62(10), 1557-62.
11. Qiu, Y., Wang, X., Zhang, Y., Carr, A.J., Zhu, L., Xia, Z., and Sabokbar, A., Development of a refined tenocyte expansion culture technique for tendon tissue engineering. *Journal of Tissue Engineering and Regenerative Medicine*, **2014**, 8(12), 955-962.
12. Herchenhan, A., Bayer, M.L., Eliasson, P., Magnusson, S.P., and Kjaer, M., Insulin-like growth factor I enhances collagen synthesis in engineered human tendon tissue. *Growth Horm IGF Res*, **2015**, 25(1), 13-9.
13. Disser, N.P., Sugg, K.B., Talarek, J.R., Sarver, D.C., Rourke, B.J., and Mendias, C.L., Insulin-like growth factor 1 signaling in tenocytes is required for adult tendon growth. *Faseb j*, **2019**, 33(11), 12680-12695.

14. Costa, M.A., Wu, C., Pham, B.V., Chong, A.K.S., Pham, H.M., and Chang, J., Tissue engineering of flexor tendons: Optimization of tenocyte proliferation using growth factor supplementation. *Tissue Engineering*, **2006**, 12(7), 1937-1943.
15. Musson, D.S., Tay, M.L., Chhana, A., Pool, B., Coleman, B., Naot, D., and Cornish, J., Lactoferrin and parathyroid hormone are not harmful to primary tenocytes in vitro, but PDGF may be. *Muscles Ligaments Tendons J*, **2017**, 7(2), 215-222.
16. Orfei, C.P., Vigano, M., Pearson, J.R., Colombini, A., De Luca, P., Ragni, E., Santos-Ruiz, L., and de Girolamo, L., In Vitro Induction of Tendon-Specific Markers in Tendon Cells, Adipose- and Bone Marrow-Derived Stem Cells is Dependent on TGF3, BMP-12 and Ascorbic Acid Stimulation. *International Journal of Molecular Sciences*, **2019**, 20(1), 1-15.
17. Kurtz, C.A., Loebig, T.G., Anderson, D.D., DeMeo, P.J., and Campbell, P.G., Insulin-like growth factor I accelerates functional recovery from Achilles tendon injury in a rat model. *Am J Sports Med*, **1999**, 27(3), 363-9.
18. Andersson, T., Eliasson, P., and Aspenberg, P., Growth hormone does not stimulate early healing in rat tendons. *Int J Sports Med*, **2012**, 33(3), 240-3.
19. Prabhath, A., Vernekar, V.N., Esdaille, C.J., Eisenberg, E., Lebaschi, A., Badon, M., Seyedsalehi, A., Dzidotor, G., Tang, X., and Dymont, N., Pegylated insulin-like growth factor-1 biotherapeutic delivery promotes rotator cuff regeneration in a rat model. *Journal of Biomedical Materials Research Part A*, **2022**, 110(7), 1356-1371.
20. Dahlgren, L.A., van der Meulen, M.C., Bertram, J.E., Starrak, G.S., and Nixon, A.J., Insulin-like growth factor-I improves cellular and molecular aspects of healing in a collagenase-induced model of flexor tendinitis. *J Orthop Res*, **2002**, 20(5), 910-9.
21. Wong, C.C., Huang, Y.M., Chen, C.H., Lin, F.H., Yeh, Y.Y., and Bai, M.Y., Cytokine and Growth Factor Delivery from Implanted Platelet-Rich Fibrin Enhances Rabbit Achilles Tendon Healing. *Int J Mol Sci*, **2020**, 21(9).
22. Lyras, D.N., Kazakos, K., Verettas, D., Chronopoulos, E., Folaranmi, S., and Agrogiannis, G., Effect of combined administration of Transforming Growth Factor-b1 and Insulin-like Growth Factor I on the mechanical properties of a patellar tendon defect model in rabbits. *Acta Orthopaedica Belgica*, **2010**, 76(3), 380-386.
23. Lyras, D.N., Kazakos, K., Agrogiannis, G., Verettas, D., Kokka, A., Kiziridis, G., Chronopoulos, E., and Tryfonidis, M., Experimental study of tendon healing early phase: Is IGF-1 expression influenced by platelet rich plasma gel? *Orthopaedics & Traumatology: Surgery & Research*, **2010**, 96(4), 381-387.
24. Hansen, M., Boesen, A., Holm, L., Flyvbjerg, A., Langberg, H., and Kjaer, M., Local administration of insulin-like growth factor-I (IGF-I) stimulates tendon collagen synthesis in humans. *Scandinavian Journal of Medicine & Science in Sports*, **2013**, 23(5), 614-619.
25. Olesen, J.L., Hansen, M., Turtumoygard, I.F., Hoffner, R., Schjerling, P., Christensen, J., Mendias, C.L., Magnusson, P.S., and Kjaer, M., No Treatment Benefits of Local Administration of Insulin-like Growth Factor-1 in Addition to Heavy Slow Resistance Training in Tendinopathic Human Patellar Tendons: A Randomized, Double-Blind, Placebo-Controlled Trial With 1-Year Follow-up. *Am J Sports Med*, **2021**, 49(9), 2361-2370.
26. Doessing, S., Heinemeier, K.M., Holm, L., Mackey, A.L., Schjerling, P., Rennie, M., Smith, K., Reitelseder, S., Kappelgaard, A.M., Rasmussen, M.H., et al., Growth hormone stimulates the collagen synthesis in human tendon and skeletal muscle without affecting myofibrillar protein synthesis. *J Physiol*, **2010**, 588(Pt 2), 341-51.
